# Supplementary material for: One-Time Contact Application of Controlled-Release Urea and Optimized Method Improved Rice Yield and Nitrogen Use Efficiency with 50% Nitrogen Input
Source: MDPI journal article supplement (doi:10.3390/agronomy14040781), 2024-04-10
Supplement: s1 [file agronomy-2919622-supplementary.pdf › agronomy-2919622-supplementary.pdf]

Table S1 Soil moisture content and soil specific conductance in seedling experiment (2021 data)

| Item                                            | Treatment   | 1 d             | 4 d             | 7 d           | 10 d          | 13 d          |
|-------------------------------------------------|-------------|-----------------|-----------------|---------------|---------------|---------------|
| Soil moisture content (%)                       | CK          | 35.07±0.07a     | 26.13±0.05a     | 26.70±0.04cd  | 28.47±0.04abc | 31.30±0.02a   |
|                                                 | 50%CRU      | 31.07±0.03ab    | 22.17±0.02ab    | 33.83±0.01a   | 25.20±0.02abc | 23.80±0.01b   |
|                                                 | 50%CRU+S    | 31.97±0.02ab    | 21.77±0.04ab    | 33.13±0.04ab  | 25.20±0.02abc | 34.63±0.03a   |
|                                                 | 50%CRU+ BT  | 28.20±0.05ab    | 23.57±0.05ab    | 32.77±0.03ab  | 26.90±0.03abc | 33.07±0.04a   |
|                                                 | 50%CRU+BT+S | 29.70±0.05ab    | 22.87±0.02ab    | 34.27±0.01a   | 31.83±0.03a   | 31.13±0.04a   |
| Soil specific conductance (mS m <sup>-1</sup> ) | CK          | 159.33±32.62b   | 147.33±1.53d    | 118.33±10.02b | 111.00±6.56c  | 96.67±1.53d   |
|                                                 | 50%CRU      | 199.667±19.43ab | 175.00±14.00bcd | 142.33±17.79b | 210.33±11.85b | 160.33±10.02c |
|                                                 | 50%CRU+S    | 180.33±7.37ab   | 165.33±22.55bcd | 132.00±17.35b | 210.33±11.85b | 151.67±7.64c  |
|                                                 | 50%CRU+ BT  | 178.33±34.12ab  | 197.33±4.04b    | 150.67±19.86b | 211.67±23.01b | 153.00±18.33c |
|                                                 | 50%CRU+BT+S | 173.00±7.00ab   | 147.33±1.53d    | 144.33±12.50b | 217.67±16.50b | 149.37±23.12c |

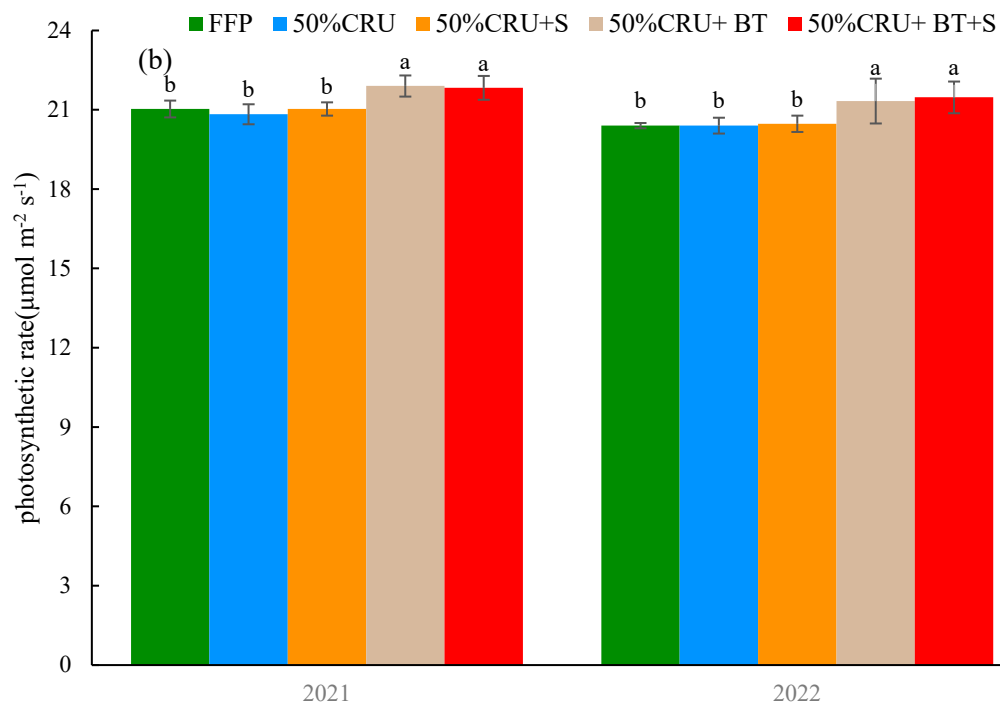

Fig. S1 photosynthetic rate at booting stage in 2021 and 2022.

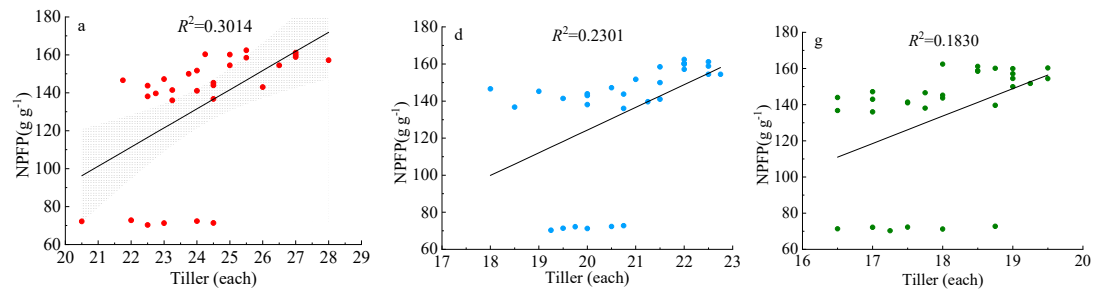

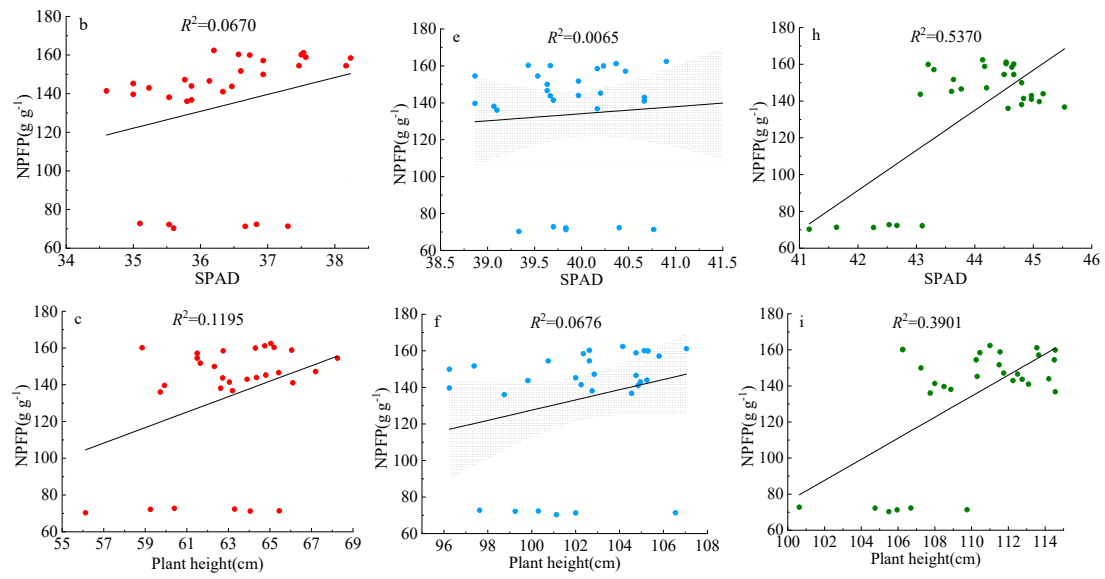

**Fig. S2** Relationship between tillering number, leaf SPAD and plant height and nitrogen partial productivity (a, b and c were tillering stage, d, e and f were booting stage, g, h and i were full heading stage)
